# Supplementary material for: Effectiveness of one dose of MVA-BN smallpox vaccine against monkeypox in England using the case-coverage method
Source: bioRxiv or medRxiv preprint supplement (doi:10.1101/2022.12.13.22282654), 2022-12-14
Supplement: Supplementary file [file media-1.pdf]

**Table S2: Vaccine first doses and coverage estimation by week in GBMSM, England**

| <b>Week number</b> | <b>Week commencing</b> | <b>First doses</b> | <b>Doses 0-13 days ago</b> | <b>Cumulative doses</b> | <b>Doses <math>\geq 14</math> days ago</b> | <b>Denominator</b> | <b>Coverage 0-13 days ago</b> | <b>Coverage <math>\geq 14</math> days ago</b> |
|--------------------|------------------------|--------------------|----------------------------|-------------------------|--------------------------------------------|--------------------|-------------------------------|-----------------------------------------------|
| <b>26</b>          | 27/06/2022             | 90                 | 90                         | 90                      | 0                                          | 89,240             | 90                            | 90                                            |
| <b>27</b>          | 04/07/2022             | 1,050              | 1,140                      | 1,140                   | 0                                          | 89,240             | 1,050                         | 1,140                                         |
| <b>28</b>          | 11/07/2022             | 2,439              | 3,489                      | 3,579                   | 90                                         | 89,240             | 2,439                         | 3,489                                         |
| <b>29</b>          | 18/07/2022             | 4,939              | 7,378                      | 8,518                   | 1,140                                      | 89,240             | 4,939                         | 7,378                                         |
| <b>30</b>          | 25/07/2022             | 6,762              | 11,701                     | 15,280                  | 3,579                                      | 89,240             | 6,762                         | 11,701                                        |
| <b>31</b>          | 01/08/2022             | 7,401              | 14,163                     | 22,681                  | 8,518                                      | 89,240             | 7,401                         | 14,163                                        |
| <b>32</b>          | 08/08/2022             | 5,567              | 12,968                     | 28,248                  | 15,280                                     | 89,240             | 5,567                         | 12,968                                        |
| <b>33</b>          | 15/08/2022             | 2,800              | 8,367                      | 31,048                  | 22,681                                     | 89,240             | 2,800                         | 8,367                                         |
| <b>34</b>          | 22/08/2022             | 2,492              | 5,292                      | 33,540                  | 28,248                                     | 89,240             | 2,492                         | 5,292                                         |
| <b>35</b>          | 29/08/2022             | 2,388              | 4,880                      | 35,928                  | 31,048                                     | 89,240             | 2,388                         | 4,880                                         |
| <b>36</b>          | 05/09/2022             | 2,259              | 4,647                      | 38,187                  | 33,540                                     | 89,240             | 2,259                         | 4,647                                         |
| <b>37</b>          | 12/09/2022             | 1,754              | 4,013                      | 39,941                  | 35,928                                     | 89,240             | 1,754                         | 4,013                                         |
| <b>38</b>          | 19/09/2022             | 1,897              | 3,651                      | 41,838                  | 38,187                                     | 89,240             | 1,897                         | 3,651                                         |
| <b>39</b>          | 26/09/2022             | 1,676              | 3,573                      | 43,514                  | 39,941                                     | 89,240             | 1,676                         | 3,573                                         |
| <b>40</b>          | 03/10/2022             | 1,463              | 3,139                      | 44,977                  | 41,838                                     | 89,240             | 1,463                         | 3,139                                         |
